# Supplementary figures and images for: Proviruses with Long-Term Stable Expression Accumulate in Transcriptionally Active Chromatin Close to the Gene Regulatory Elements: Comparison of ASLV-, HIV- and MLV-Derived Vectors
Source: MDPI journal article supplement (doi:10.3390/v10030116), 2018-03-08

**A**

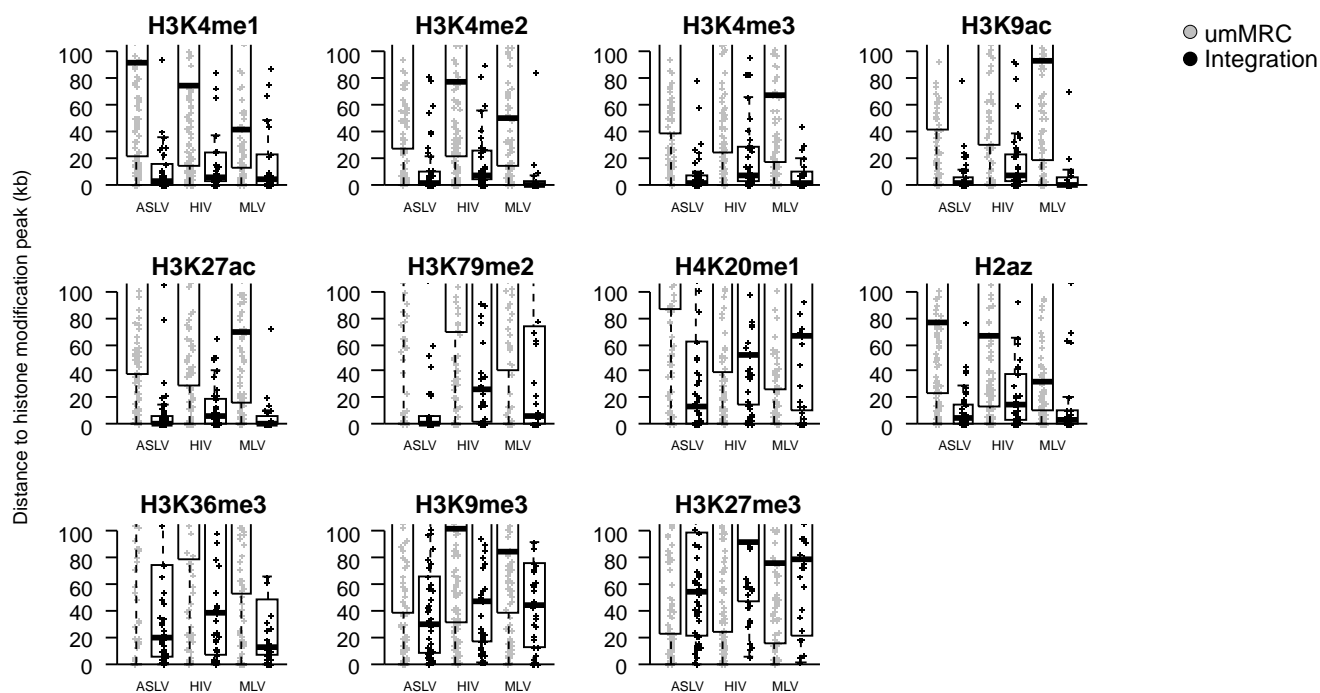

● umMRC  
● Integration

**B**

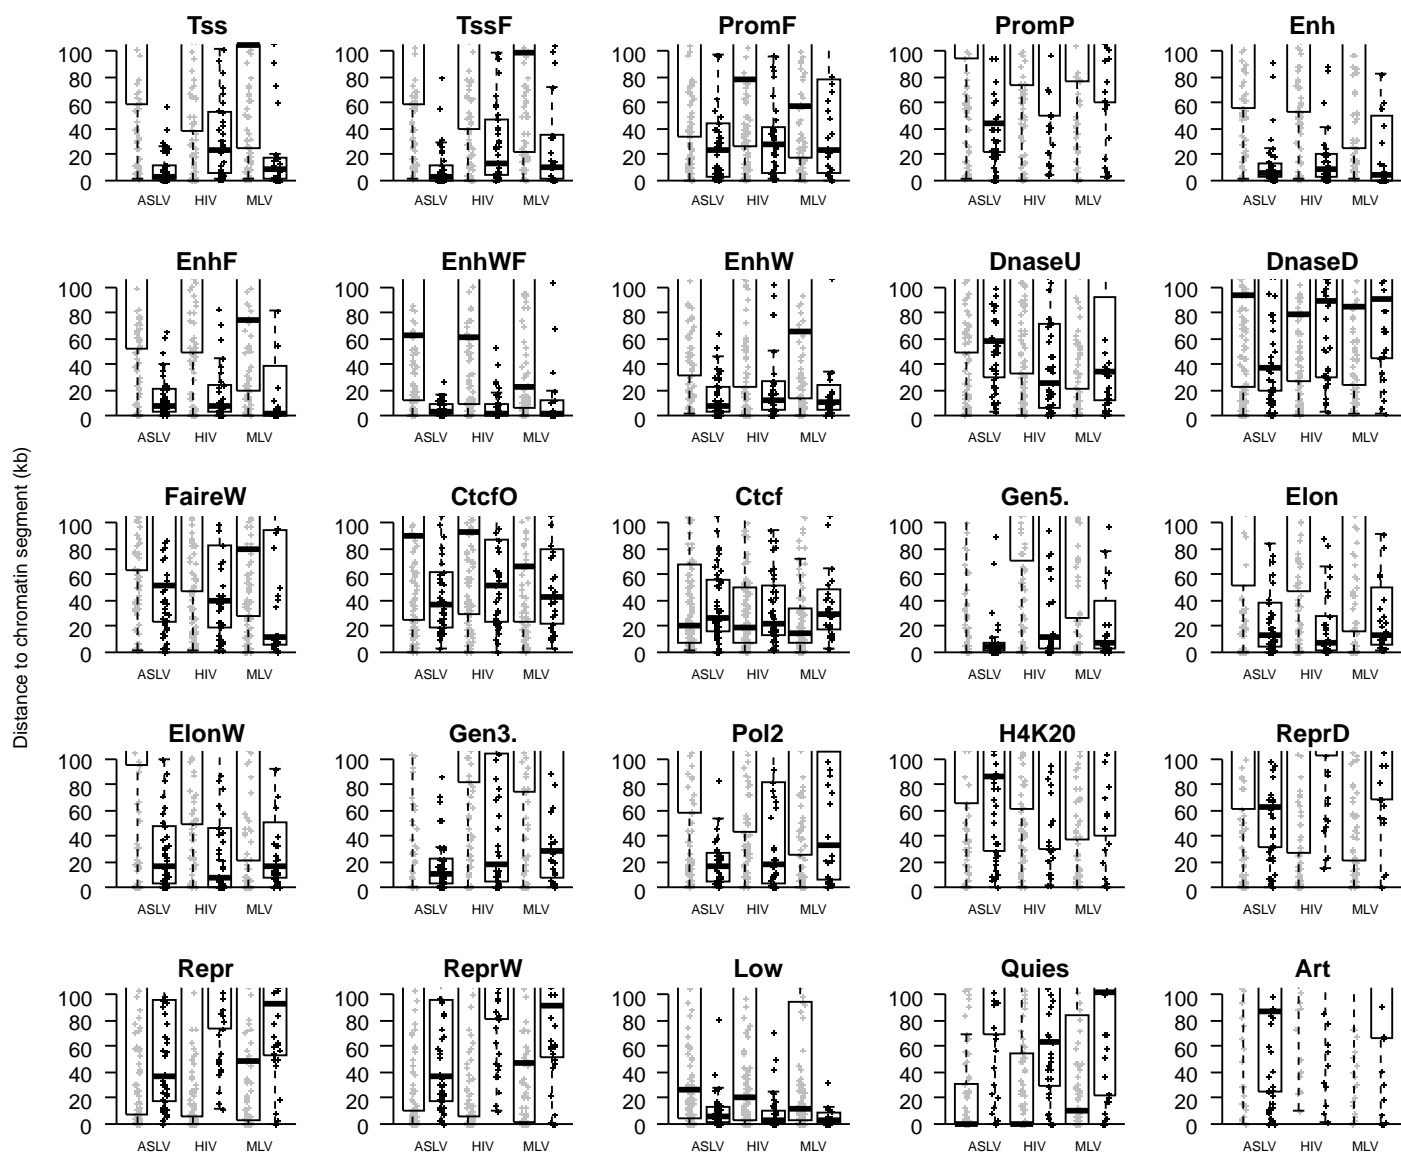

Distance to chromatin segment (kb)

Supplement: s1 [file s1]

**A**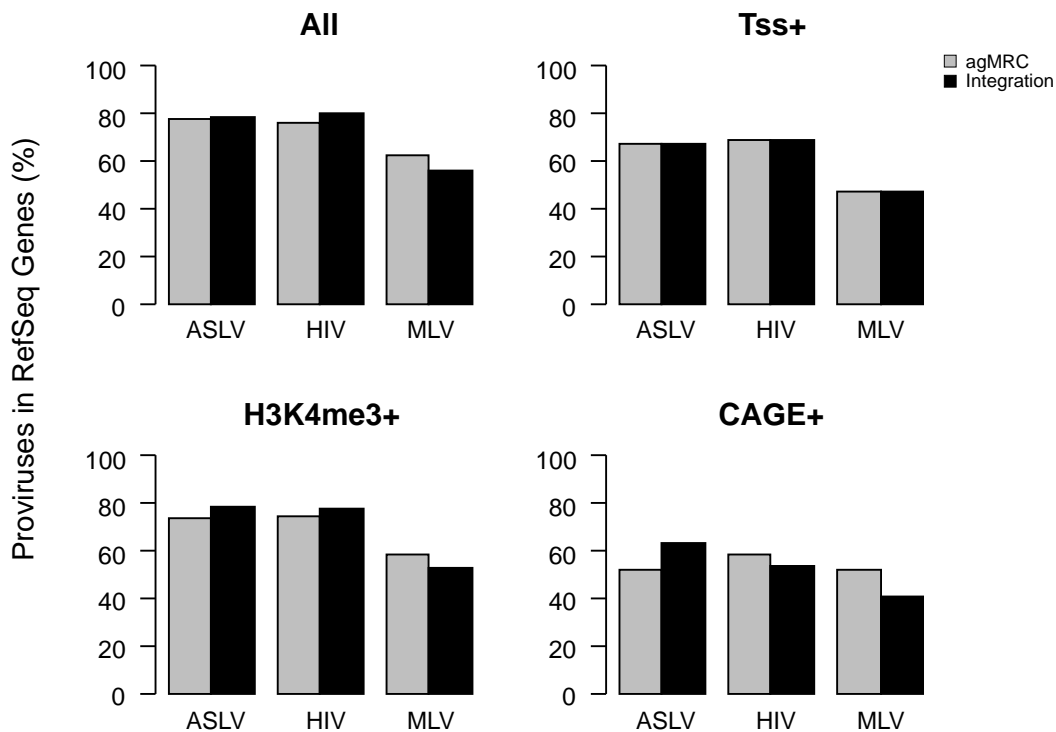**B**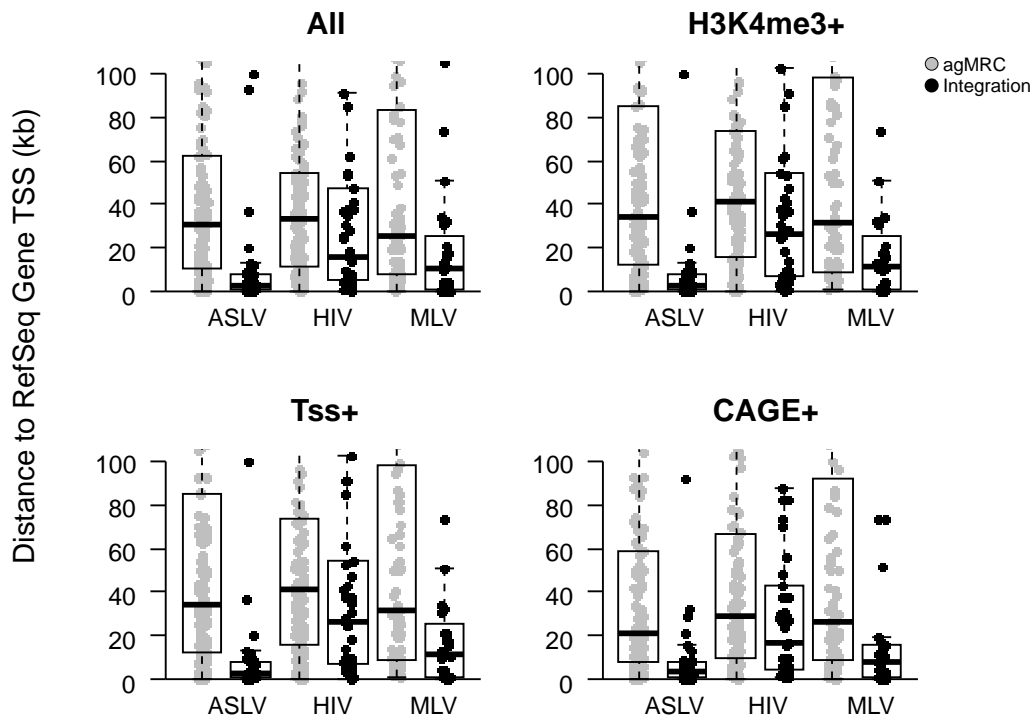

Supplement: s1 [file s1]

**All**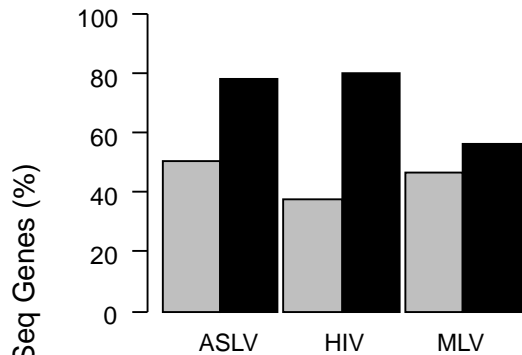**Tss+**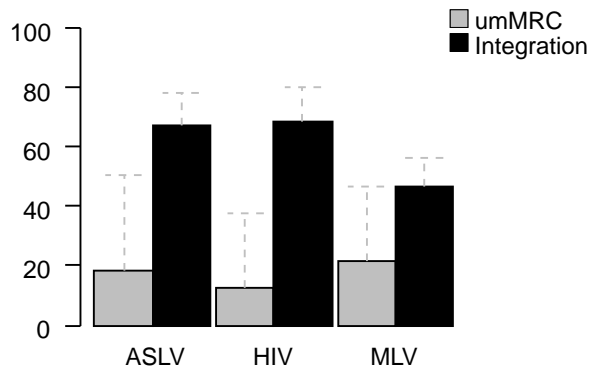**H3K4me3+**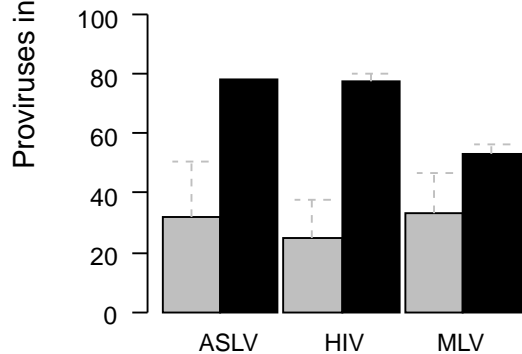**CAGE+**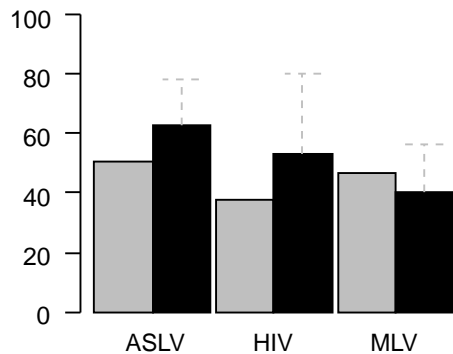

Supplement: s1 [file s1]

**A**

Distance to histone modification peak (kb)

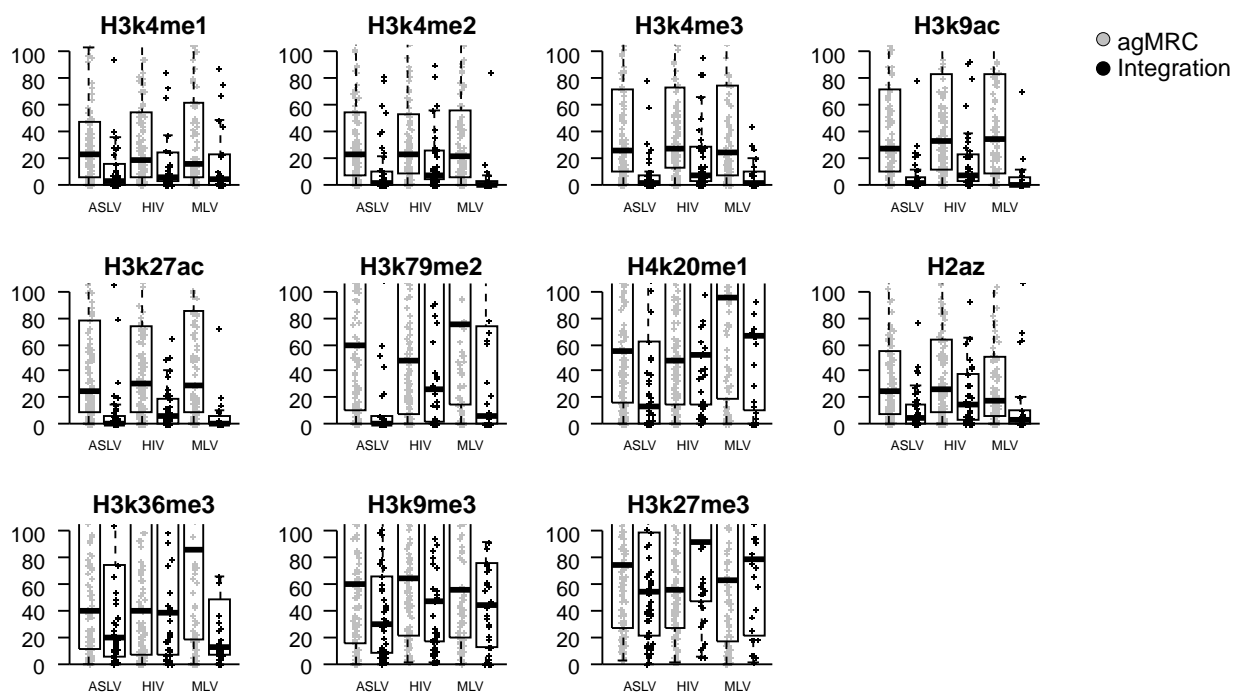

**B**

Distance to chromatin segment (kb)

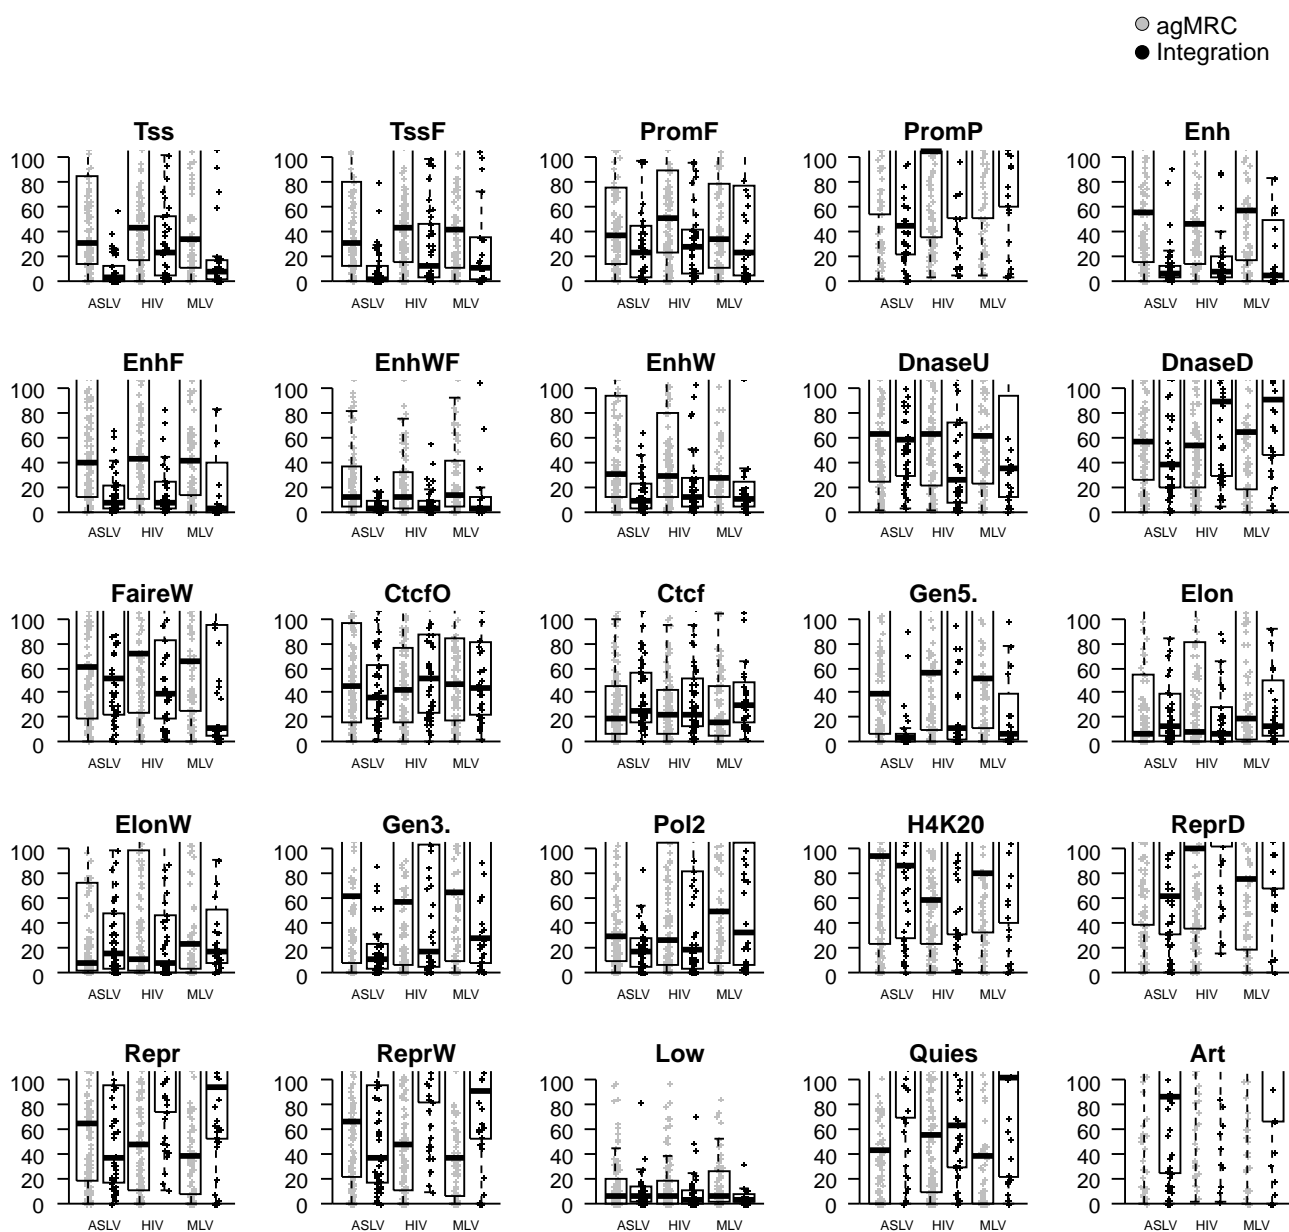

Supplement: s1 [file s1]

# Relative GFP fluorescence intensity of the clones at 30 dpi

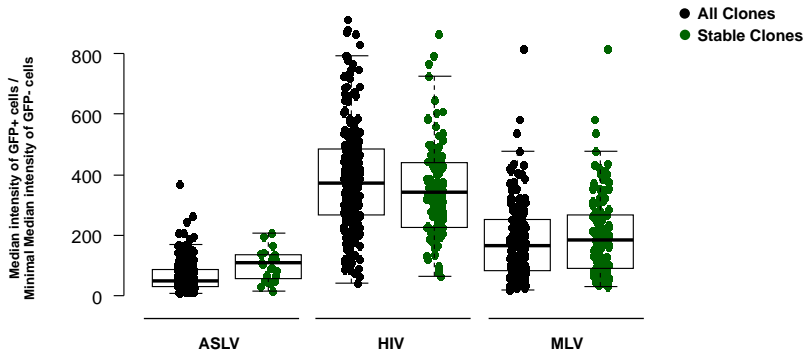

Supplement: s1 [file s1]

# CpG island

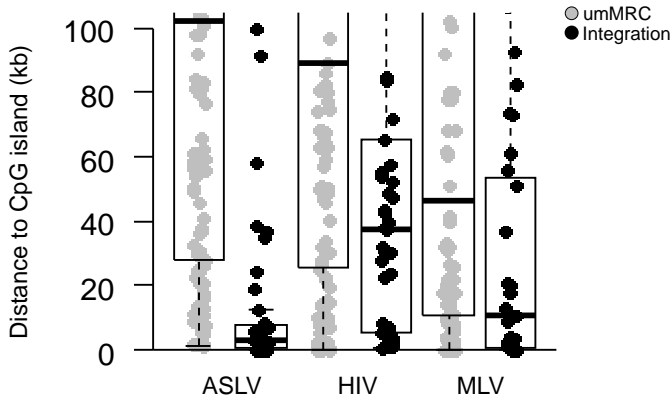

Supplement: s1 [file s1]
